# Supplementary material for: Optogenetic clustering of CNK1 reveals mechanistic insights in RAF and AKT signalling controlling cell fate decisions
Source: PubMed Central journal article supplement (PMC5128868; doi:10.1038/srep38155), 2016-11-30
Supplement: srep38155-s1.pdf [file srep38155-s1.pdf]

## **Supplemental Information**

### **Optogenetic clustering of CNK1 reveals mechanistic insights in RAF and AKT signaling controlling cell fate decisions**

Adrian Fischer, Bettina Warscheid, Wilfried Weber, and Gerald Radziwill

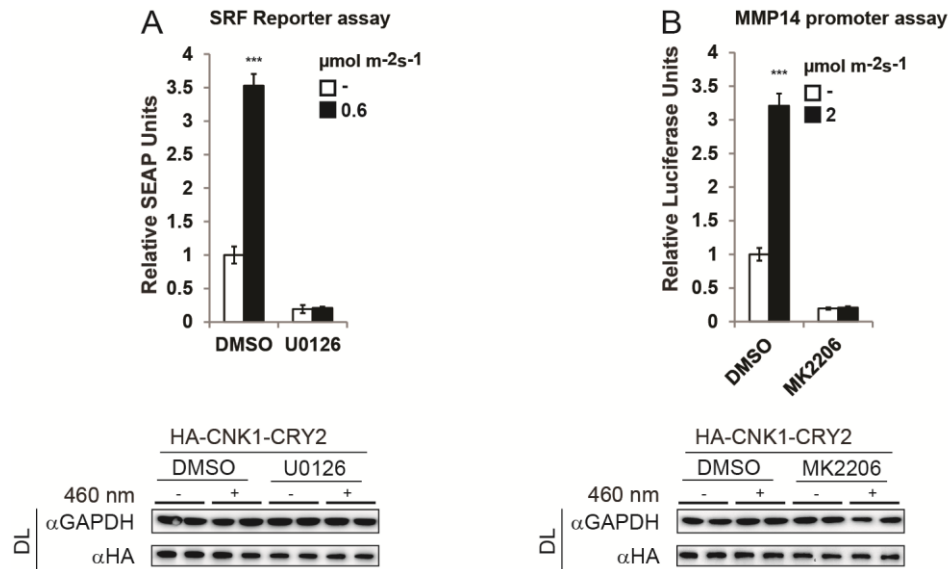

**Figure S1. Specificity of reporter assays for ERK and AKT signaling (related to Figure 1 C and D).**

**(A)** SRF reporter stimulation by CNK1-CRY2 exposed to  $0.6 \mu\text{mol m}^{-2}\text{s}^{-1}$  depends on MEK/ERK signaling.

**(B)** MMP14 promoter activation by CNK1 exposed to  $2 \mu\text{mol m}^{-2}\text{s}^{-1}$  depends on AKT signaling. N=3, mean + SEM, two-tailed Student's *t*-test, \*\*\**p* < 0.001.

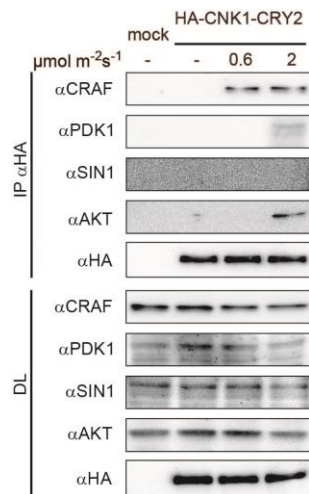

**Figure S2. Analysis of CNK1 clusters (related to Figure 1F)**

AKT and PDK1 but not SIN1, a key component of mTORC2, co-precipitated with HA-CNK1-CRY2 upon illumination with  $2 \mu\text{mol m}^{-2}\text{s}^{-1}$ .

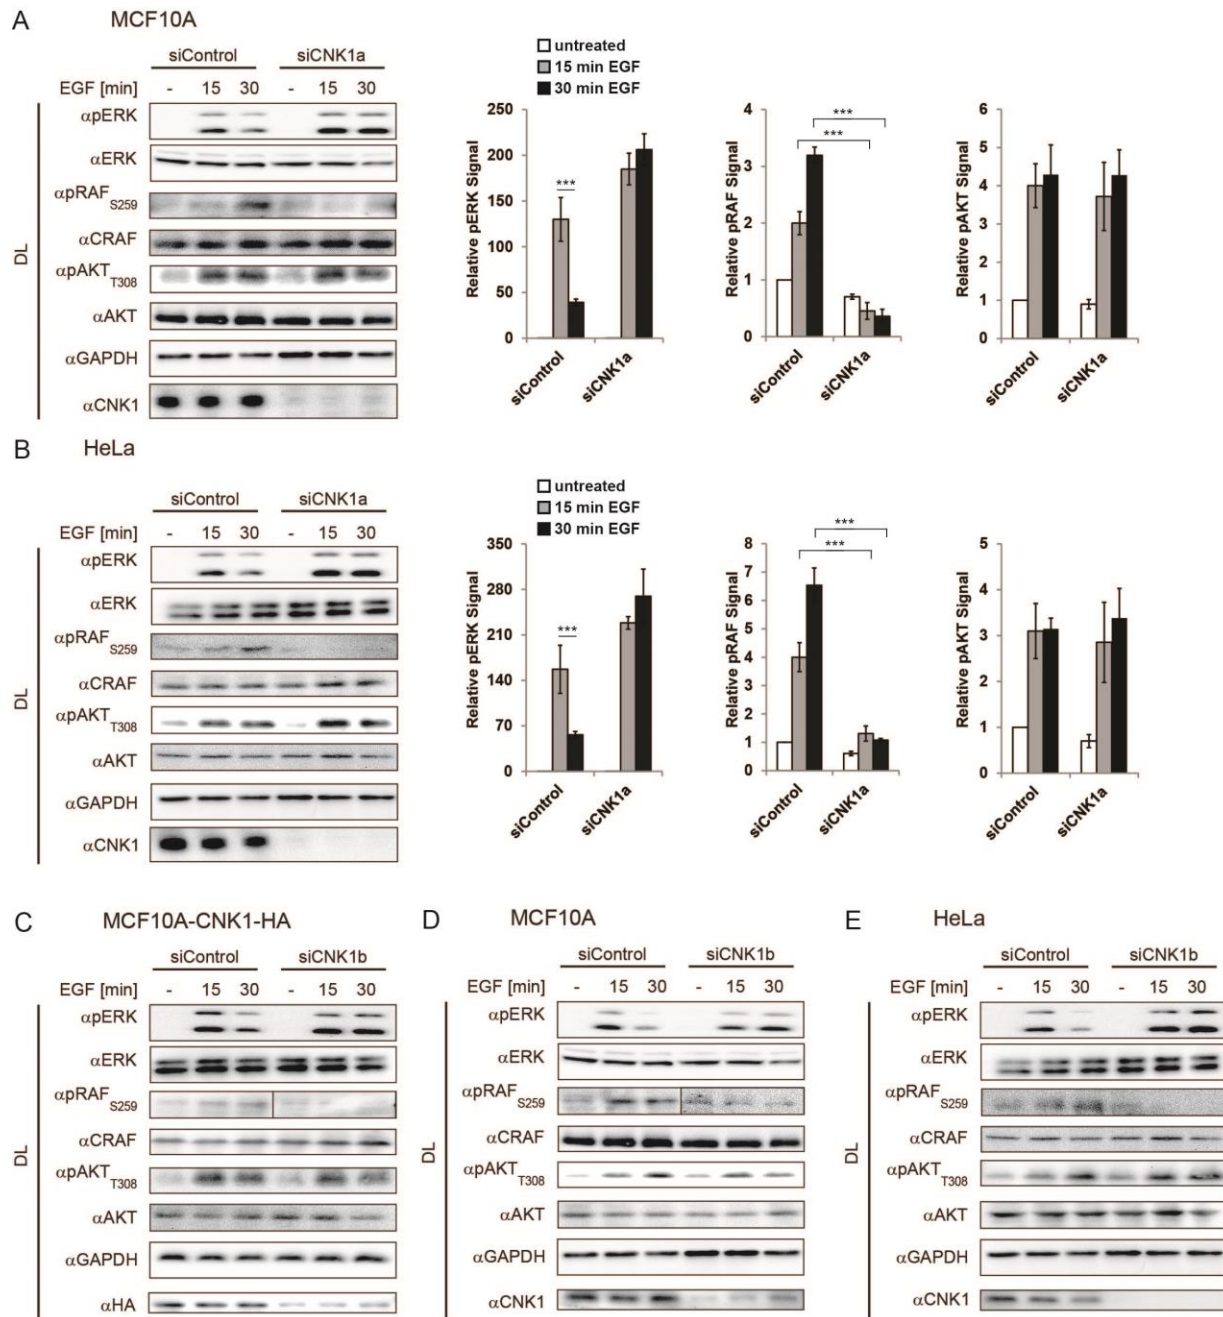

**Figure S3. CNK1 mediates AKT-dependent inhibition of CRAF (related to Figure 5).**

**(A,B)** Knockdown of CNK1 by siCNK1a in parental MCF10A cells (A) and in HeLa cells (B) abrogates AKT-dependent inhibitory phosphorylation of CRAF at Ser259 leading to increased ERK phosphorylation in EGF (20 ng/ml) stimulated cells. Bar charts represent quantified signals of three independent experiments. N=3, mean + SEM, two-tailed Student's *t*-test, \*\*\**p* < 0.001. **(C, D and E)** Knockdown of CNK1 by siCNK1b confirmed the results obtained by siCNK1a.

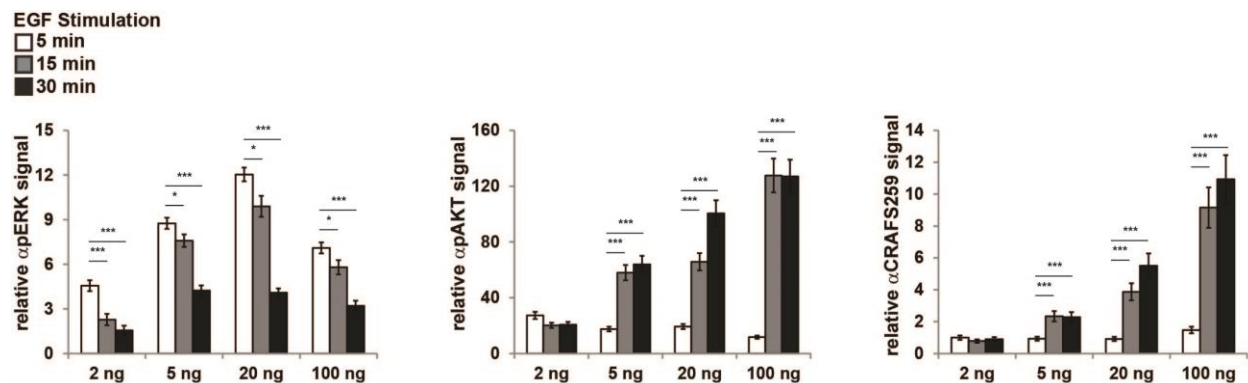

**Figure S4. EGF dose-dependent stimulation of ERK, AKT and RAF (related to Figure 6A).**

HEK293T cells stimulated with increasing EGF doses for different time periods as indicated. Quantification of the immunoblots shown in Figure 6A, direct lysates.

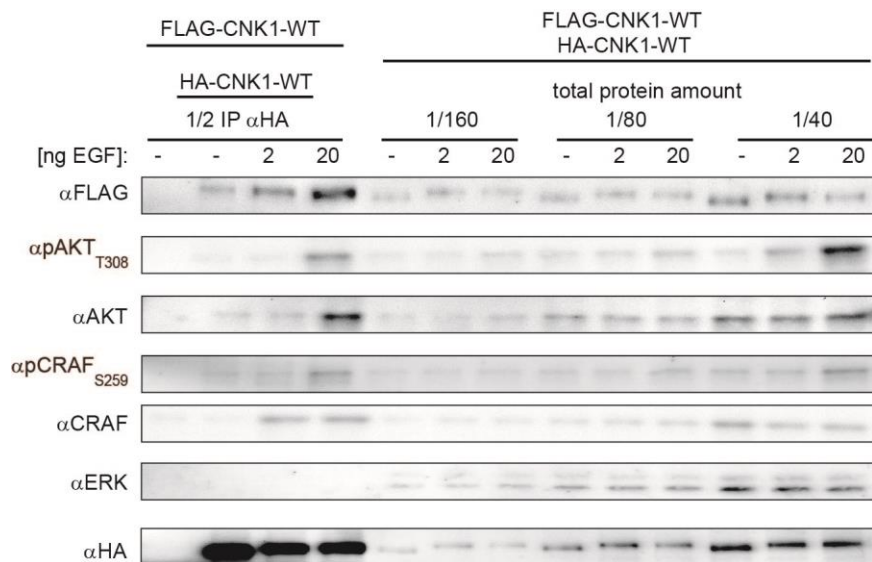

**Figure S5. Subfractions of RAF and AKT are complexed with CNK1 in EGF-stimulated cells (related to Figure 6).**

HEK293T cells expressing FLAG-CNK1-WT and HA-CNK1-WT were treated with EGF (2ng and 20 ng) for 15 min. Immunopurified HA-CNK1-WT (IP  $\alpha$ HA) was analysed for co-precipitated AKT and CRAF proteins. Direct lysates (DL) serve to estimate the fractions of RAF and AKT bound to CNK1.

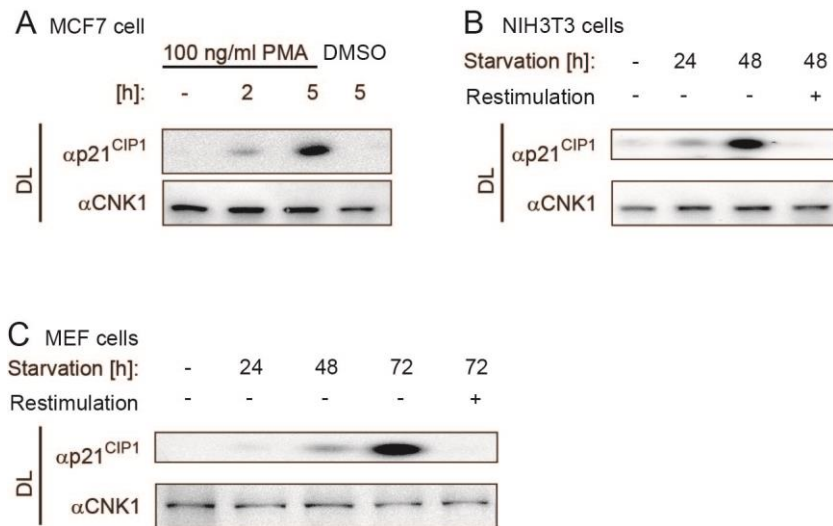

**Figure S6. Induction of p21<sup>CIP</sup> did not affect the CNK1 expression level in MCF7, NIH3T3 and MEF cells (related to Figure 7).**

- (A)** Treatment of serum-starved MCF7 cells with PMA induced expression of p21<sup>CIP</sup>.
- (B)** Serum starvation of NIH3T3 cells induced expression of p21<sup>CIP</sup> reverted by restimulation.
- (C)** Serum starvation of MEF cells induced expression of p21<sup>CIP</sup> reverted by restimulation.
- (A-C) The expression level of CNK1 was not affected by induction of differentiation.

Day 2 of differentiation (C2 cells)

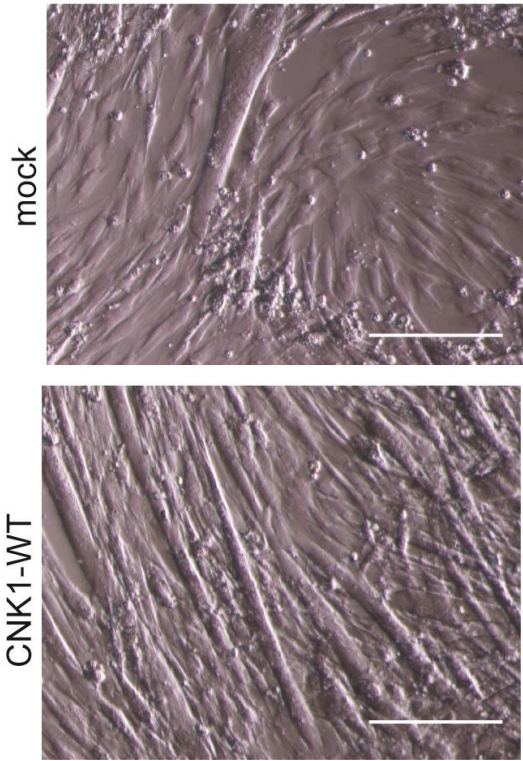

**Figure S7. CNK1 accelerates phenotypic differentiation of C2 cells (related to Figure 7).**

C2 cells transiently transfected with the CNK1-WT construct showed a more differentiated phenotype compared to mock transfected cells. Scale bar: 100  $\mu\text{m}$ .

Related to Figure 1

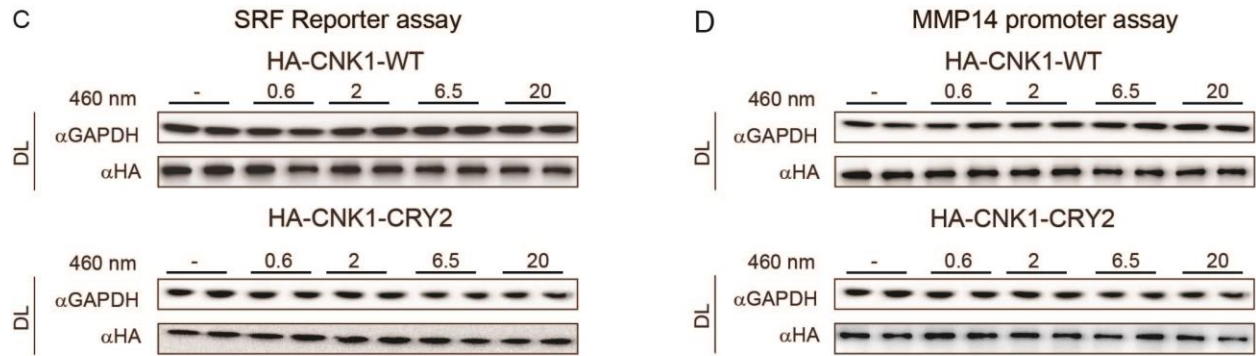

Related to Figure 4

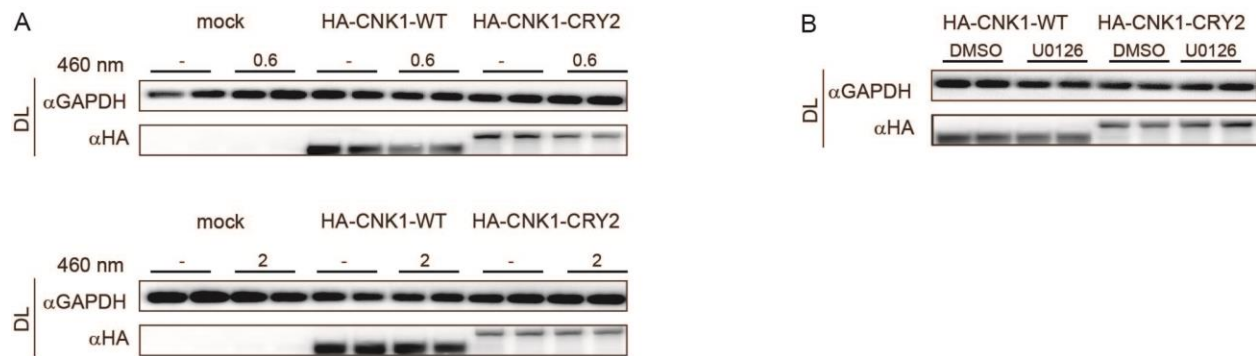

Related to Figure 5

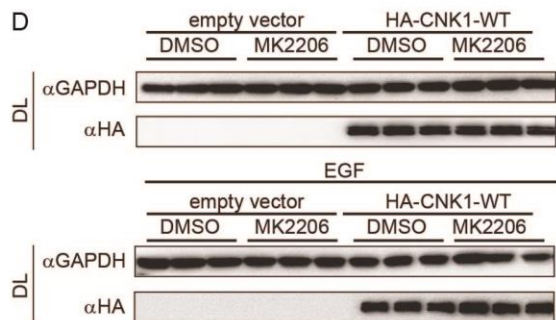

**Figure S8. Immunoblots for control of protein expression in reporter assays (related to figures as indicated).** Each reporter assay was performed in triplicates. For each reporter assay one set of exemplary blots are shown.

**Supplementary table 1:** Primer designed and used for PCR amplification in this work.

| <b>CNK1-<math>\Delta</math>SAM and CNK1-CRY2 Primer</b> |                                                             |
|---------------------------------------------------------|-------------------------------------------------------------|
| <b>Name</b>                                             | <b>Sequence</b>                                             |
| bb1_forward                                             | CTGCCGCTTACCGGATAC                                          |
| bb1_reverse                                             | CCACTGAGCGTCAGACC                                           |
| O_AF_33 forward (delta SAM)                             | TACGCCTCCCTCATGGAACCGGTAGAGACCAG<br>CTCCAGGCTACAGACAG       |
| O_AF_37 reverse (delta SAM)                             | CAGGCTTTGCAGGTTCTCTGTCTGTAGCCTGG<br>AGCTGGTCTCTACCGGTTCCATG |
| YN_CNK1-fw                                              | TACCCATACGATGTTCCAGATTACGCTGAACC<br>GGTAGAGACCTG            |
| YN_CNK1-rev                                             | TCTTTTGTCCATCTTCATGGTGGCGCGCCGG<br>CGTAGTCGGGCAC            |
| C_cry2_fw                                               | TACCCATACGATGTTCCAGATTACGCTGGCGC<br>GCCACCATG               |
| C_cry2_rev                                              | ACCACCACCCGCGCGCTTAATGCGCCGTT<br>ATGCTCCGATCATGATC          |
